# Supplementary material for: Genome-wide SNP identification and QTL mapping for black rot resistance in cabbage
Source: PubMed Central journal article supplement (PMC4323122; doi:10.1186/s12870-015-0424-6), 2015-02-03

Additional file 3 Figure S1. Disease index distribution of F<sub>2</sub> population, evaluated by average scores resulted from inoculated F<sub>3</sub> plants

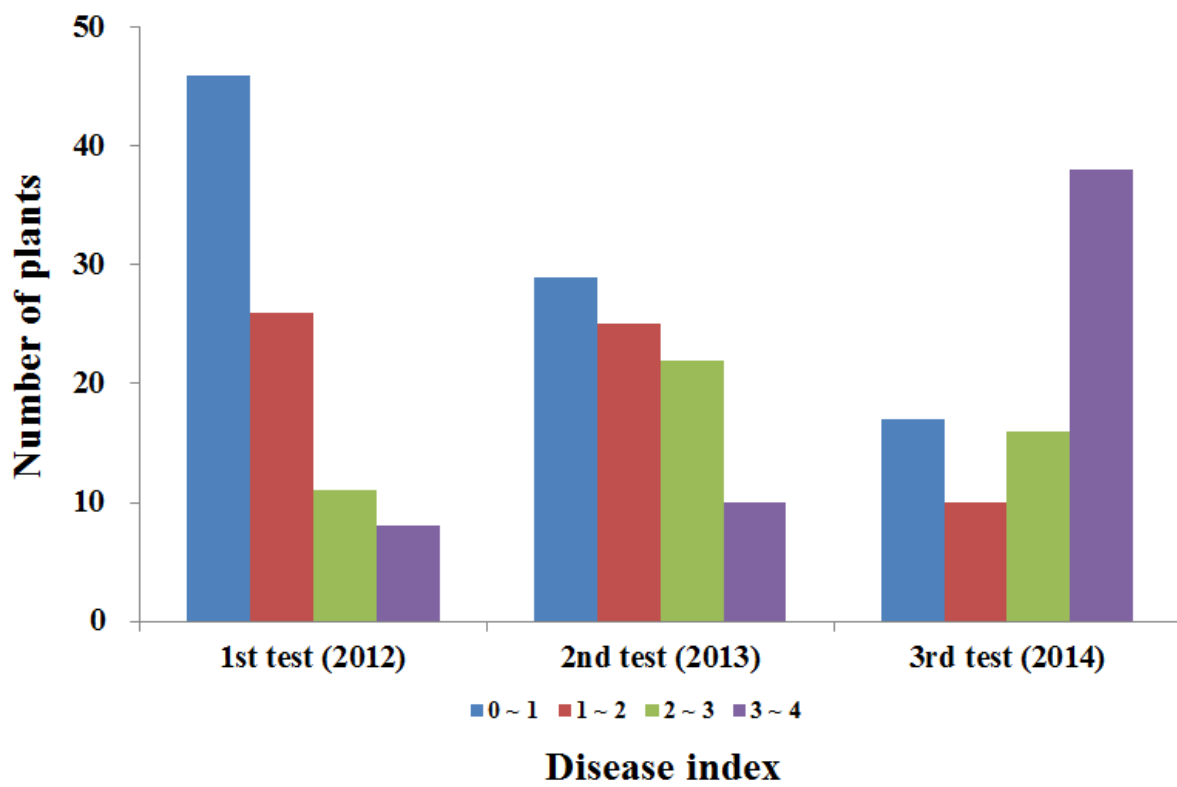

Supplement: 12870_2015_424_MOESM3_ESM.pdf [file 12870_2015_424_MOESM3_ESM.pdf]
